# Supplementary material
Source: ML conference proceedings conference paper supplement (https://openaccess.thecvf.com/content/CVPR2023/html/Li_Are_Data-Driven_Explanations_CVPR_2023_paper.html)
Supplement: Supplementary file 1 [file Li_Are_Data-Driven_Explanations_CVPR_2023_supplemental.pdf]

# Are Data-driven Explanations Robust against Out-of-distribution Data?

## Supplementary Material

Tang Li      Fengchun Qiao      Mengmeng Ma      Xi Peng  
University of Delaware  
{tangli, fengchun, mengma, xipeng}@udel.edu

### 1. Additional Results

#### 1.1. Robustness against Out-of-distribution Data

We empirically investigate the robustness of data-driven explanations against *out-of-distribution* data. We evaluate the problem on an OOD generalization benchmark image dataset *Terra Incognita* [2] and a scientific tabular dataset *Urban Land* [5]. For image data, we evaluate ERM [18], GroupDRO [14] and IRM [1] methods, and leverage the Grad-CAM [15] to generate explanations. For scientific tabular data, we use the Input Gradient [16] method to generate explanations, and leverage scientific consistency as the metric to measure explanation quality. Tab. 1 and Tab. 2 show a more detailed comparison of each specified distribution as the testing set. For image data, we can observe a constant explanation fidelity drop on the out-of-distribution data for all tested methods. For scientific tabular data, we can observe a constant scientific consistency drop on the OOD data for all continental regions.

#### 1.2. Evaluation on Terra Incognita

In the experiment on *Terra Incognita* [2], additional visual comparisons on class *cat* and *coyote* are shown in Fig. 1. Results demonstrate that our method can alleviate the model’s reliance on *spurious correlations* (e.g., background pixels), and makes consistent explanations on the *out-of-distribution* data.

#### 1.3. Evaluation on VLCS

In the experiment on *VLCS* [4], additional visual comparisons on class *dog* and *person* are shown in Fig. 2. Results demonstrate that our method can alleviate the model’s reliance on *spurious correlations* (e.g., background pixels), and makes consistent explanations on the *out-of-distribution* data. Note that our explanations depict the contour of the object better than other explanations.

#### 1.4. Generalize to Different Explanation Methods

In the experiment on generalizing to different explanation methods, additional visual comparisons on *VLCS* [4]

| Method        | Test Distribution | iAUC $\uparrow$ |       | $\Delta \downarrow$ |
|---------------|-------------------|-----------------|-------|---------------------|
|               |                   | ID              | OOD   |                     |
| ERM [18]      | Location 100      | 0.761           | 0.517 | <b>0.244</b>        |
|               | Location 38       | 0.780           | 0.644 | 0.136               |
|               | Location 43       | 0.806           | 0.614 | 0.192               |
|               | Location 46       | 0.783           | 0.560 | 0.223               |
|               | Avg.              | 0.778           | 0.584 | 0.194               |
| GroupDRO [14] | Location 100      | 0.726           | 0.687 | 0.039               |
|               | Location 38       | 0.738           | 0.578 | 0.160               |
|               | Location 43       | 0.738           | 0.608 | 0.130               |
|               | Location 46       | 0.766           | 0.525 | <b>0.241</b>        |
|               | Avg.              | 0.742           | 0.597 | 0.145               |
| IRM [1]       | Location 100      | 0.575           | 0.489 | 0.086               |
|               | Location 38       | 0.745           | 0.651 | 0.094               |
|               | Location 43       | 0.539           | 0.438 | <b>0.101</b>        |
|               | Location 46       | 0.589           | 0.500 | 0.089               |
|               | Avg.              | 0.612           | 0.520 | 0.092               |

Table 1. Evaluation of the explanation fidelity (iAUC) of *in-distribution* (ID) and *out-of-distribution* (OOD) data on *Terra Incognita* [2] dataset. Each specified distribution serves as the testing set. Note that the explanation fidelity severely dropped on OOD data for all tested methods. Specifically, although the IRM method performs a fewer explanation fidelity drop, its in-distribution iAUC is much lower than other methods.

dataset are shown in Fig. 3. Results demonstrate that our model’s advanced explainability can be generalized to a variety of data-driven explanation methods, such as Integrated Gradients (IG) [17] and Gradient SHAP [10]. Our method significantly alleviate the model’s reliance on *spurious correlations* (e.g., tree branches), and makes consistent explanations on the *out-of-distribution* data. Note that our explanations clearly depict the contour of the object.

## 2. Experimental Details

### 2.1. Architecture Design and Hyper-parameters

We provide additional experimental details on the two image datasets and one scientific tabular dataset: *Terra*

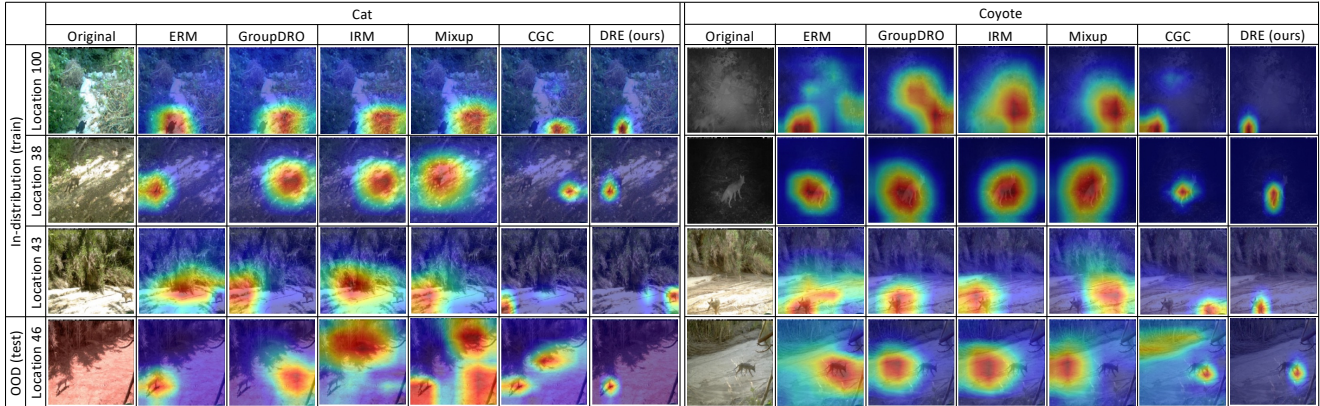

Figure 1. Grad-CAM explanations for images from *Cat* (left) and *Coyote* (right) classes in *Terra Incognita* [2] dataset. The model trained via existing methods, such as ERM [18], Mixup [19], and CGC [11], not only focuses on the objects, but also distribution-specific associations, it getting even severe on *out-of-distribution* data. On the contrary, our model alleviates the reliance on *spurious correlations* (e.g., background pixels), and makes consistent explanations on OOD data. This figure is best viewed in color.

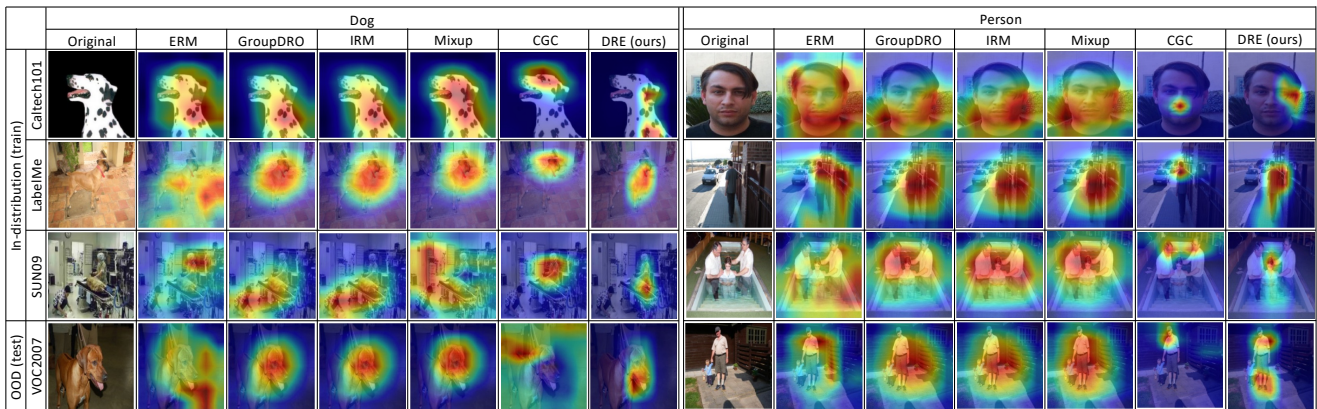

Figure 2. Grad-CAM explanations for images from *Dog* (left) and *Person* (right) classes in *VLCS* [4] dataset. The model trained via existing methods, such as ERM [18], Mixup [19], and CGC [11], not only focuses on the objects, but also distribution-specific associations, it getting even severe on *out-of-distribution* data. On the contrary, our model alleviates the reliance on *spurious correlations* (e.g., background pixels), and makes consistent explanations on OOD data. Note that our explanations depict the contour of the object better than other explanations.

*Incognita* [2], *VLCS* [4], and *Urban Land* [5]. Following the settings in [6] and [9], Tab. 5 lists all hyperparameters, their default values and random search distribution. We optimize all models using Adam [8].

For *Terra Incognita* [2] and *VLCS* [4], the backbone model is “ResNet-50” [7], detailed architecture is shown in Tab. 3.

For *Urban Land* [5], the backbone model is “U-Net” [12], detailed architecture is shown in Tab. 4.

## 2.2. Employed Gradient-based Methods

We provide additional details of the gradient-based explanation methods employed in the proposed *Distributionally Robust Explanations* (DRE) method. Built upon our discussions in the Related Work section of the main paper,

gradient-based explanation methods offer two properties: (i) computation efficiency; (ii) fully differentiable and thus can be integrated into optimization.

For scientific tabular data (*Urban Land* [5]), we leverage the Input Gradient [16] to calculate explanations, because of its fine-grained resolution and advanced explanation performance on truly continuous inputs [13]. Denote  $x$  as an input sample, the predictive model provides a scalar logit  $f(x)$  for a particular prediction. An explanation method  $g(\cdot)$  calculates an explanation (e.g., heatmap) with the same size as the input, which attributes the model’s decision to the features with a higher score. The Input Gradient corresponds to the gradient of the scalar logit for a prediction

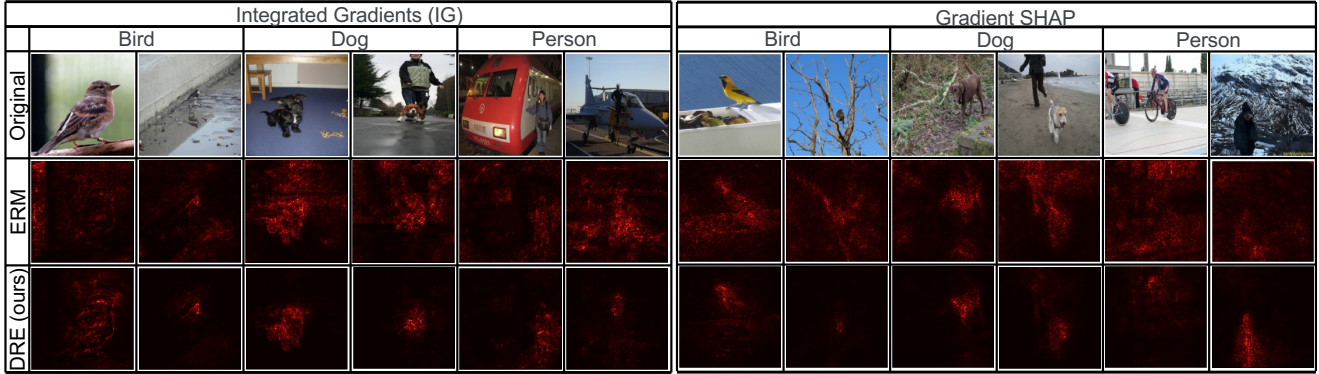

Figure 3. Integrated Gradients (IG) [17] and Gradient SHAP [10] saliency maps for *out-of-distribution* data from VLCS [4] dataset. Using VOC2007 [3] as the testing set, for ERM model the saliency maps of both Integrated Gradients (IG) [17] and Gradient SHAP [10] methods are excessively focused on background pixels, such as branch and ground. Our explanations significantly alleviate the salience of *spurious correlations* and clearly depict the contour of the object.

| Test Distribution | SC $\uparrow$ |        | $\Delta \downarrow$ |
|-------------------|---------------|--------|---------------------|
|                   | ID            | OOD    |                     |
| Africa            | 0.968         | 0.810  | 0.158               |
| E. Asia           | 0.835         | 0.779  | 0.056               |
| Europe            | 0.169         | 0.100  | 0.069               |
| N. Africa         | 0.545         | -0.707 | <b>1.252</b>        |
| N. America        | 0.236         | -0.653 | 0.889               |
| Oceania           | 0.944         | 0.855  | 0.089               |
| Russia            | 0.257         | -0.856 | 1.113               |
| S. America        | 0.341         | -0.837 | 1.178               |
| S. Asia           | 0.520         | -0.504 | 1.024               |
| Avg.              | 0.535         | -0.113 | 0.648               |

Table 2. Evaluation of the scientific consistency (SC) of *in-distribution* (ID) and *out-of-distribution* (OOD) data on *Urban Land* [5] dataset using the ERM [18] method. Note that the scientific consistency severely dropped on the *out-of-distribution* data for all tested distributions.

with regard to the input, namely:

$$g_{\text{grad}}(x) = \frac{\partial f(x)}{\partial x}. \quad (1)$$

For image data (*Terra Incognita* [2] and VLCS [4]), we leverage the Grad-CAM [15] to calculate explanations. Its superior performance has been empirically proved on tasks such as explaining classification results and weakly supervised semantic segmentation. Let  $A^k$  as the feature maps of the last convolutional layer of a DNN, the neuron importance weights:

$$\alpha^k = \frac{1}{Z} \sum_i \sum_j \frac{\partial f(x)}{\partial A_{ij}^k}. \quad (2)$$

then the Grad-CAM explanation corresponds to the

| layer name | output size      | ResNet50 layers                   |
|------------|------------------|-----------------------------------|
| conv1      | $112 \times 112$ | $7 \times 7, 64$ , stride 2       |
| conv2_x    | $56 \times 56$   | $3 \times 3$ , max pool, stride 2 |
|            |                  | $1 \times 1, 64$                  |
|            |                  | $3 \times 3, 64$ $\times 3$       |
| conv3_x    | $28 \times 28$   | $1 \times 1, 128$                 |
|            |                  | $3 \times 3, 128$ $\times 4$      |
|            |                  | $1 \times 1, 512$                 |
| conv4_x    | $14 \times 14$   | $1 \times 1, 256$                 |
|            |                  | $3 \times 3, 256$ $\times 6$      |
|            |                  | $1 \times 1, 1024$                |
| conv5_x    | $7 \times 7$     | $1 \times 1, 512$                 |
|            |                  | $3 \times 3, 512$ $\times 3$      |
|            |                  | $1 \times 1, 2048$                |
|            | $1 \times 1$     | average pool, 10-d fc, softmax    |
| FLOPs      |                  | $3.8 \times 10^9$                 |

Table 3. Architecture for *Terra Incognita* [2] dataset. For VLCS [4] dataset, the only difference is to change the fc-layer to 5-d.

weighted average of feature maps of the last convolutional layer, namely:

$$g_{\text{grad-cam}}(x) = \text{ReLU}(\sum_k \alpha^k A^k) \quad (3)$$

## References

- [1] Martin Arjovsky, Léon Bottou, Ishaan Gulrajani, and David Lopez-Paz. Invariant risk minimization. *arXiv preprint arXiv:1907.02893*, 2019. 1
- [2] Sara Beery, Grant Van Horn, and Pietro Perona. Recognition in terra incognita. In *Proceedings of the European conference on computer vision (ECCV)*, pages 456–473, 2018. 1, 2, 3

| layer names | output size    | layer (filter size)                             | #filters |
|-------------|----------------|-------------------------------------------------|----------|
| inconv      | $16 \times 16$ | Conv(3,3) $\times$ 2                            | 64       |
| down1       | $8 \times 8$   | Conv(3,3) $\times$ 2<br>Maxpool(2,2) $\times$ 1 | 128      |
| down2       | $4 \times 4$   | Conv(3,3) $\times$ 2<br>Maxpool(2,2) $\times$ 1 | 256      |
| down3       | $2 \times 2$   | Conv(3,3) $\times$ 2<br>Maxpool(2,2) $\times$ 1 | 512      |
| down4       | $1 \times 1$   | Conv(3,3) $\times$ 2<br>Maxpool(2,2) $\times$ 1 | 1024     |
| up1         | $2 \times 2$   | Conv(3,3) $\times$ 2<br>Deconv(2,2) $\times$ 1  | 512      |
| up2         | $4 \times 4$   | Conv(3,3) $\times$ 2<br>Deconv(2,2) $\times$ 1  | 256      |
| up3         | $8 \times 8$   | Conv(3,3) $\times$ 2<br>Deconv(2,2) $\times$ 1  | 128      |
| up4         | $16 \times 16$ | Conv(3,3) $\times$ 2<br>Deconv(2,2) $\times$ 1  | 64       |
| outconv     | $16 \times 16$ | Conv(1,1) $\times$ 1                            | 1        |
| FLOPs       |                | $1.2 \times 10^7$                               |          |

Table 4. The U-Net [12] architecture for *Urban Land* [5] dataset.

| Condition | Parameter     | Default value | Random distribution             |
|-----------|---------------|---------------|---------------------------------|
| ResNet50  | learning rate | 5e-5          | $10^{\text{Uniform}(-5, -3.5)}$ |
|           | batch size    | 32            | $2^{\text{Uniform}(3,6)}$       |
|           | dropout       | 0             | [0, 0.1, 0.5]                   |
| U-Net     | learning rate | 1e-4          | $10^{\text{Uniform}(-5, -1)}$   |
|           | batch size    | 32            | $2^{\text{Uniform}(3,6)}$       |
|           | dropout       | 0             | [0, 0.1, 0.5]                   |
| DRE       | lambda        | 1.0           | $10^{\text{Uniform}(-3,1)}$     |
|           | gamma         | 0.1           | $10^{\text{Uniform}(-3,1)}$     |
| GroupDRO  | eta           | 0.01          | $10^{\text{Uniform}(-1,1)}$     |
| IRM       | lambda        | 100           | $10^{\text{Uniform}(-1,5)}$     |
|           | warmup iter.  | 500           | $10^{\text{Uniform}(0,4)}$      |
| Mixup     | alpha         | 0.2           | $10^{\text{Uniform}(0,4)}$      |
| CGC       | lambda        | 1.0           | $10^{\text{Uniform}(-3,1)}$     |

Table 5. Hyperparameters, default values, and their distributions.

- [3] M. Everingham, L. Van Gool, C. K. I. Williams, J. Winn, and A. Zisserman. The PASCAL Visual Object Classes Challenge 2007 (VOC2007) Results. <http://www.pascal-network.org/challenges/VOC/voc2007/workshop/index.html>. 3
- [4] Chen Fang, Ye Xu, and Daniel N Rockmore. Unbiased metric learning: On the utilization of multiple datasets and web images for softening bias. In *Proceedings of the IEEE International Conference on Computer Vision*, pages 1657–1664, 2013. 1, 2, 3
- [5] Jing Gao and Brian C O’Neill. Mapping global urban land for the 21st century with data-driven simulations and shared socioeconomic pathways. *Nature communications*, 11(1):1–12, 2020. 1, 2, 3, 4
- [6] Ishaan Gulrajani and David Lopez-Paz. In search of lost domain generalization. In *International Conference on Learning Representations*, 2020. 2
- [7] Kaiming He, Xiangyu Zhang, Shaoqing Ren, and Jian Sun. Deep residual learning for image recognition. In *Proceedings of the IEEE conference on computer vision and pattern recognition*, pages 770–778, 2016. 2
- [8] Diederik P Kingma and Jimmy Ba. Adam: A method for stochastic optimization. In *ICLR (Poster)*, 2015. 2
- [9] Tang Li, Jing Gao, and Xi Peng. Deep learning for spatiotemporal modeling of urbanization. *Advances in Neural Information Processing Systems Workshops*, 2021. 2
- [10] Scott M Lundberg and Su-In Lee. A unified approach to interpreting model predictions. *Advances in neural information processing systems*, 30, 2017. 1, 3
- [11] Vipin Pillai, Soroush Abbasi Koohpayegani, Ashley Ouligian, Dennis Fong, and Hamed Pirsiavash. Consistent explanations by contrastive learning. In *Proceedings of the IEEE/CVF Conference on Computer Vision and Pattern Recognition*, pages 10213–10222, 2022. 2
- [12] Olaf Ronneberger, Philipp Fischer, and Thomas Brox. U-net: Convolutional networks for biomedical image segmentation. In *International Conference on Medical image computing and computer-assisted intervention*, pages 234–241. Springer, 2015. 2, 4
- [13] Andrew Slavin Ross, Michael C Hughes, and Finale Doshi-Velez. Right for the right reasons: training differentiable models by constraining their explanations. In *Proceedings of the 26th International Joint Conference on Artificial Intelligence*, pages 2662–2670, 2017. 2
- [14] Shiori Sagawa, Pang Wei Koh, Tatsunori B Hashimoto, and Percy Liang. Distributionally robust neural networks. In *International Conference on Learning Representations*, 2019. 1
- [15] Ramprasaath R Selvaraju, Michael Cogswell, Abhishek Das, Ramakrishna Vedantam, Devi Parikh, and Dhruv Batra. Grad-cam: Visual explanations from deep networks via gradient-based localization. In *Proceedings of the IEEE international conference on computer vision*, pages 618–626, 2017. 1, 3
- [16] Karen Simonyan, Andrea Vedaldi, and Andrew Zisserman. Deep inside convolutional networks: Visualising image classification models and saliency maps. *arXiv preprint arXiv:1312.6034*, 2013. 1, 2
- [17] Mukund Sundararajan, Ankur Taly, and Qiqi Yan. Axiomatic attribution for deep networks. In *International conference on machine learning*, pages 3319–3328. PMLR, 2017. 1, 3
- [18] Vladimir Vapnik. *The nature of statistical learning theory*. Springer science & business media, 1999. 1, 2, 3
- [19] Minghao Xu, Jian Zhang, Bingbing Ni, Teng Li, Chengjie Wang, Qi Tian, and Wenjun Zhang. Adversarial domain adaptation with domain mixup. In *Proceedings of the AAAI Conference on Artificial Intelligence*, volume 34, pages 6502–6509, 2020. 2
